# Supplementary material for: Uncovering Tumor‐Promoting Roles of Activin A in Pancreatic Ductal Adenocarcinoma
Source: PubMed Central journal article supplement (PMC10238186; doi:10.1002/advs.202207010), 2023-04-21
Supplement: ADVS-10-2207010-s001.pdf [file ADVS-10-2207010-s001.pdf]

## Supporting Information

for *Adv. Sci.*, DOI 10.1002/adv.202207010

Uncovering Tumor-Promoting Roles of Activin A in Pancreatic Ductal Adenocarcinoma

*Seok-Yeong Yu, Yi Luan, Siyuan Tang, Amirhossein Abazarikia, Rosemary Dong, Thomas C. Caffrey, Michael A. Hollingsworth, David Oupicky and So-Youn Kim\**

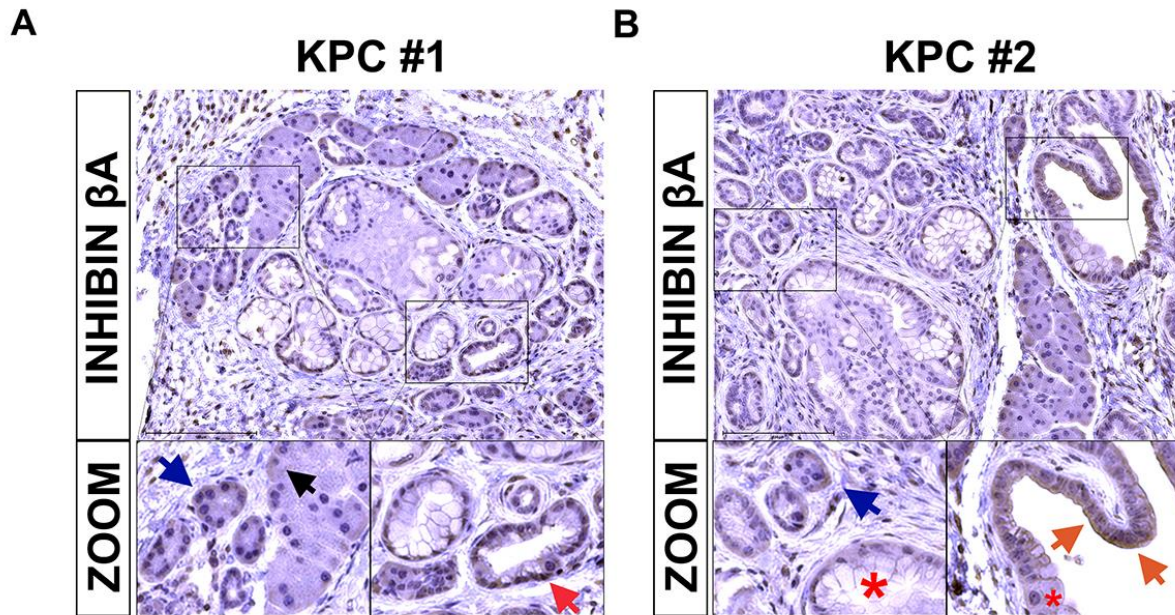

**Supplemental figures**

**Figure S1. IHC of Inhibin  $\beta$ A on tumors from KPC mice.** The black arrow is for acinar cells, the blue arrow for atrophic acinar cells, and the red arrow for PanIN in KPC #1. Red asterisk for PanIN and orange arrow for PDAC cells in KPC mouse #2.

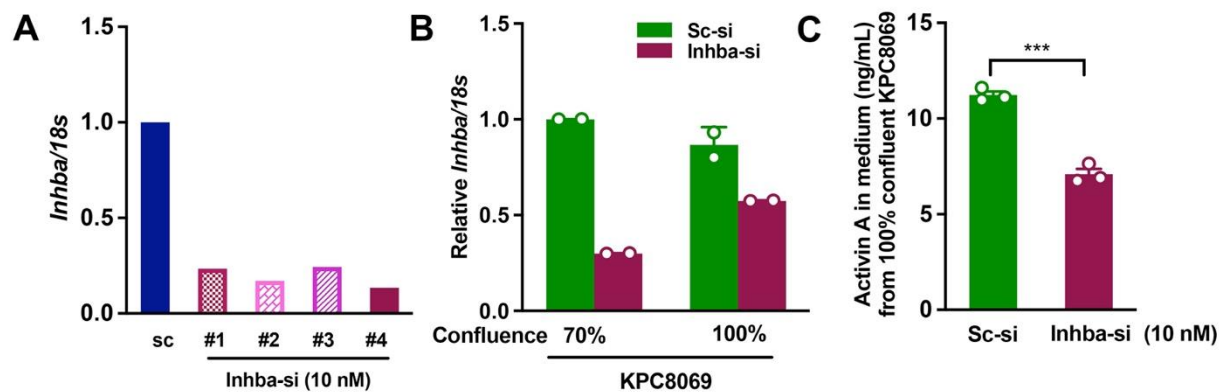

**Figure S2. The inhibitory effects of Inhba-si in KPC8069 cells.** **A.** Screening of inhibitory effects of four different *Inhba* siRNAs in KPC8069 cells. **B.** KPC8069 cells were treated with either scramble (Sc-si) or *Inhba* siRNA (Inhba-si) at 10 nM for 48 hours. The gene expression of *Inhba* was normalized with 18s. **C.** Activin A levels in media were measured using ELISA kit after 48 hour treatment of designated siRNA.

Day 12

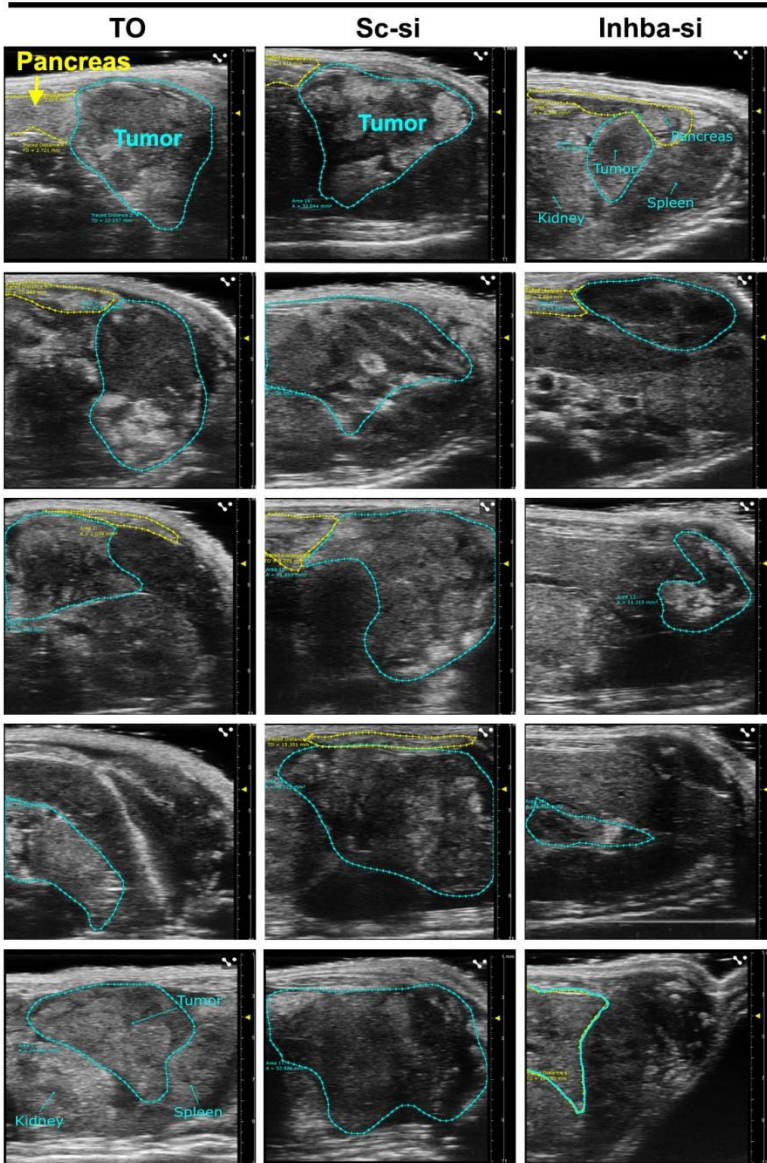

**Figure S3. Ultrasound imaging of orthotopic tumors at day 12 post-surgery.** Representative ultrasound images from orthotopic groups; the yellow line indicates pancreatic tissues and light blue indicates tumors.

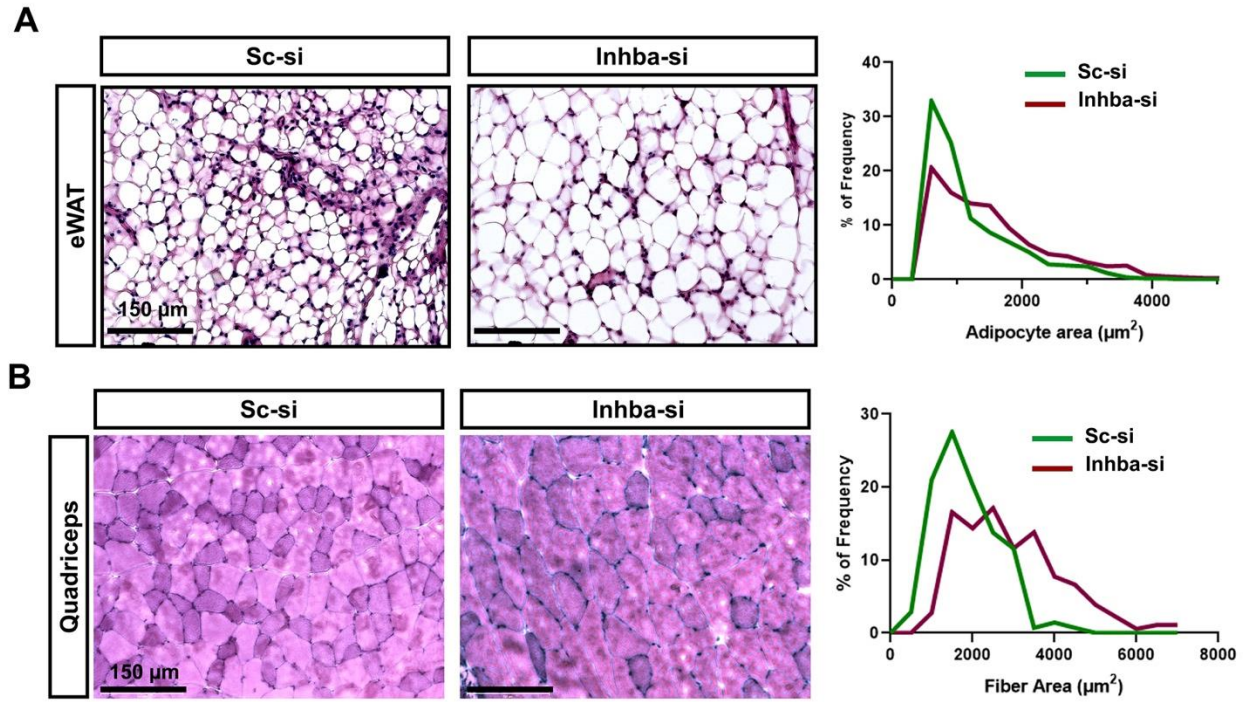

**Figure S4. H&E staining of epididymal white adipose and quadriceps skeletal muscle tissue. A.** Paraffin-embedded epididymal white adipose tissue section and size distribution of adipocytes. **B.** frozen section of quadriceps skeletal muscle tissue & size distribution of muscle fiber.

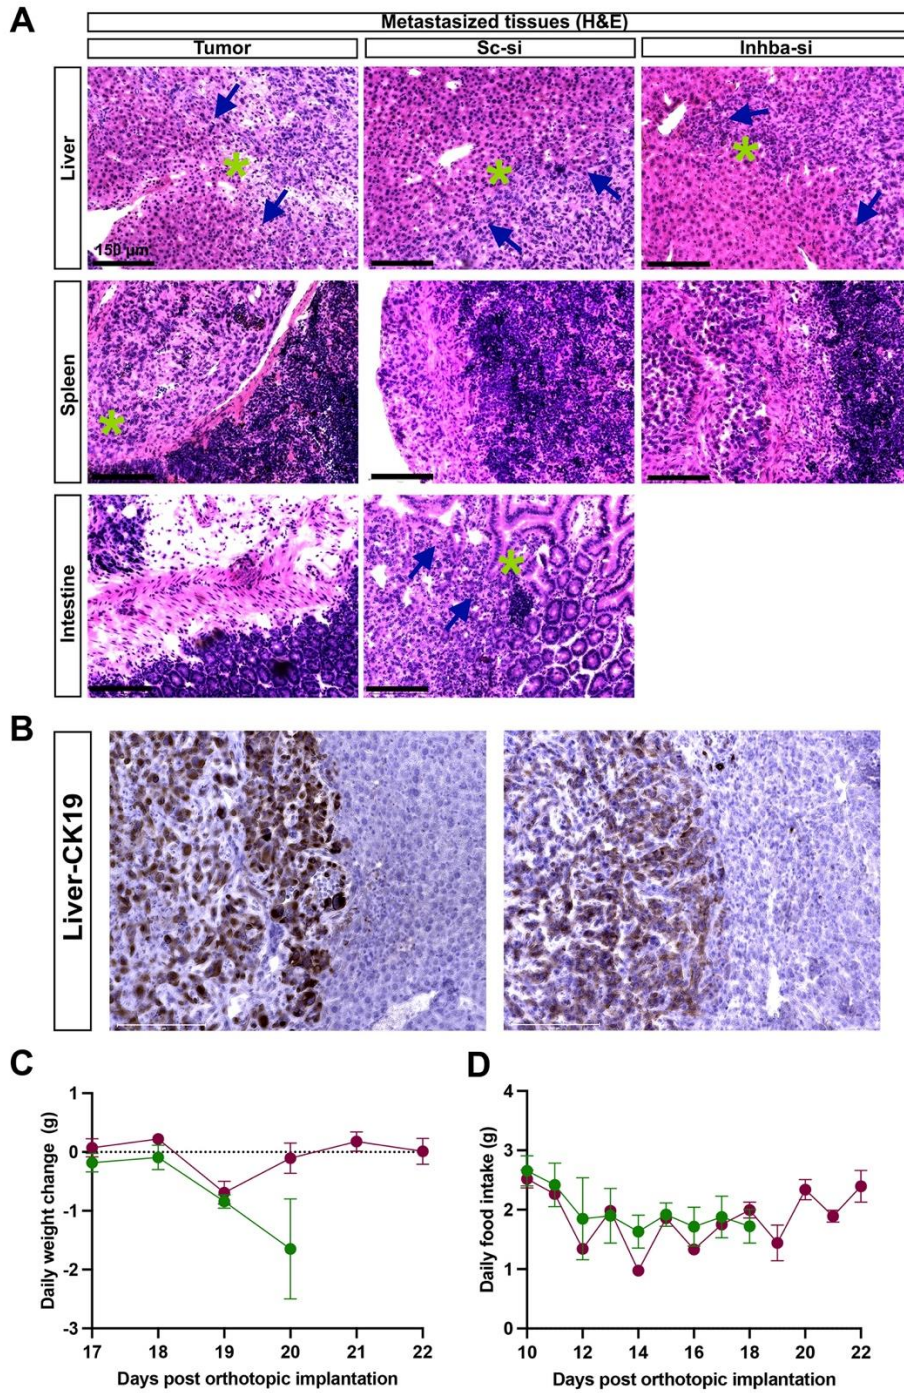

**Figure S5. PDAC metastasis and changes in body weight and food intake during survival test. A.** H&E staining of metastasized liver, spleen, and intestine to confirm invasive metastasis. Green asterisk indicates invasive metastasis. Blue arrow indicates invading cancer cells. **B.** Confirmation of invasive liver metastasis with IHC for CK19. **C and D.** Body weight change and food intake during survival test.

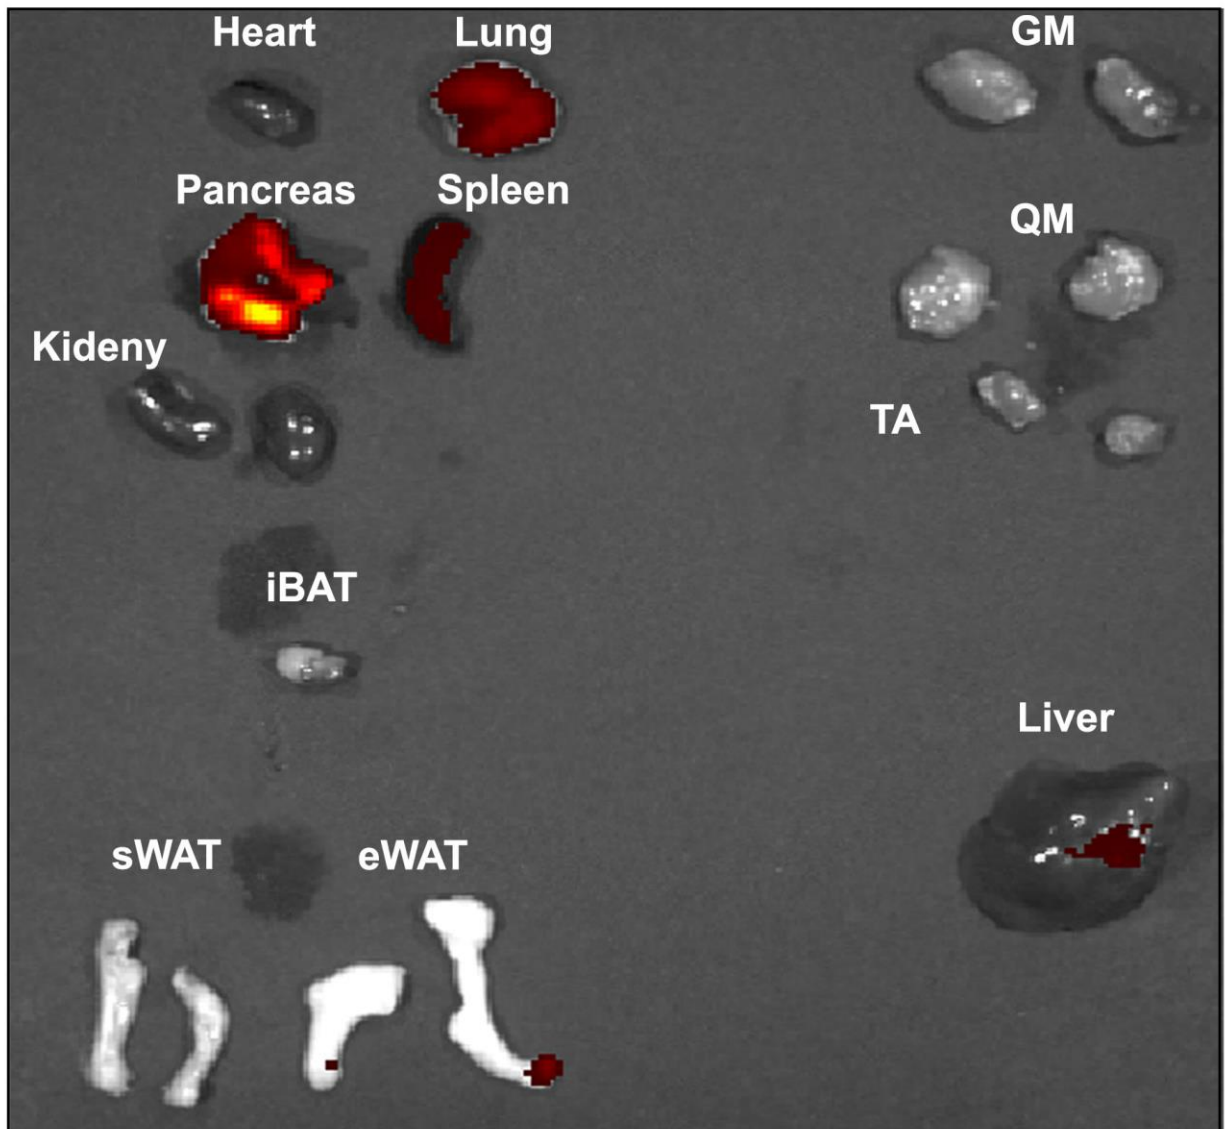

**Figure S6. Biodistribution of Cy5.5-labeled siRNA-PCX nanoparticles *in vivo*.** Representative whole image of accumulated Cy5.5 fluorescence in tissues taken by IVIS imaging; Interscapular brown adipose tissue (iBAT), subcutaneous white adipose tissue (sWAT), epididymal white adipose tissue (eWAT), gastrocnemius muscle (GM), quadriceps muscle (QM), and tibialis anterior muscle (TA).

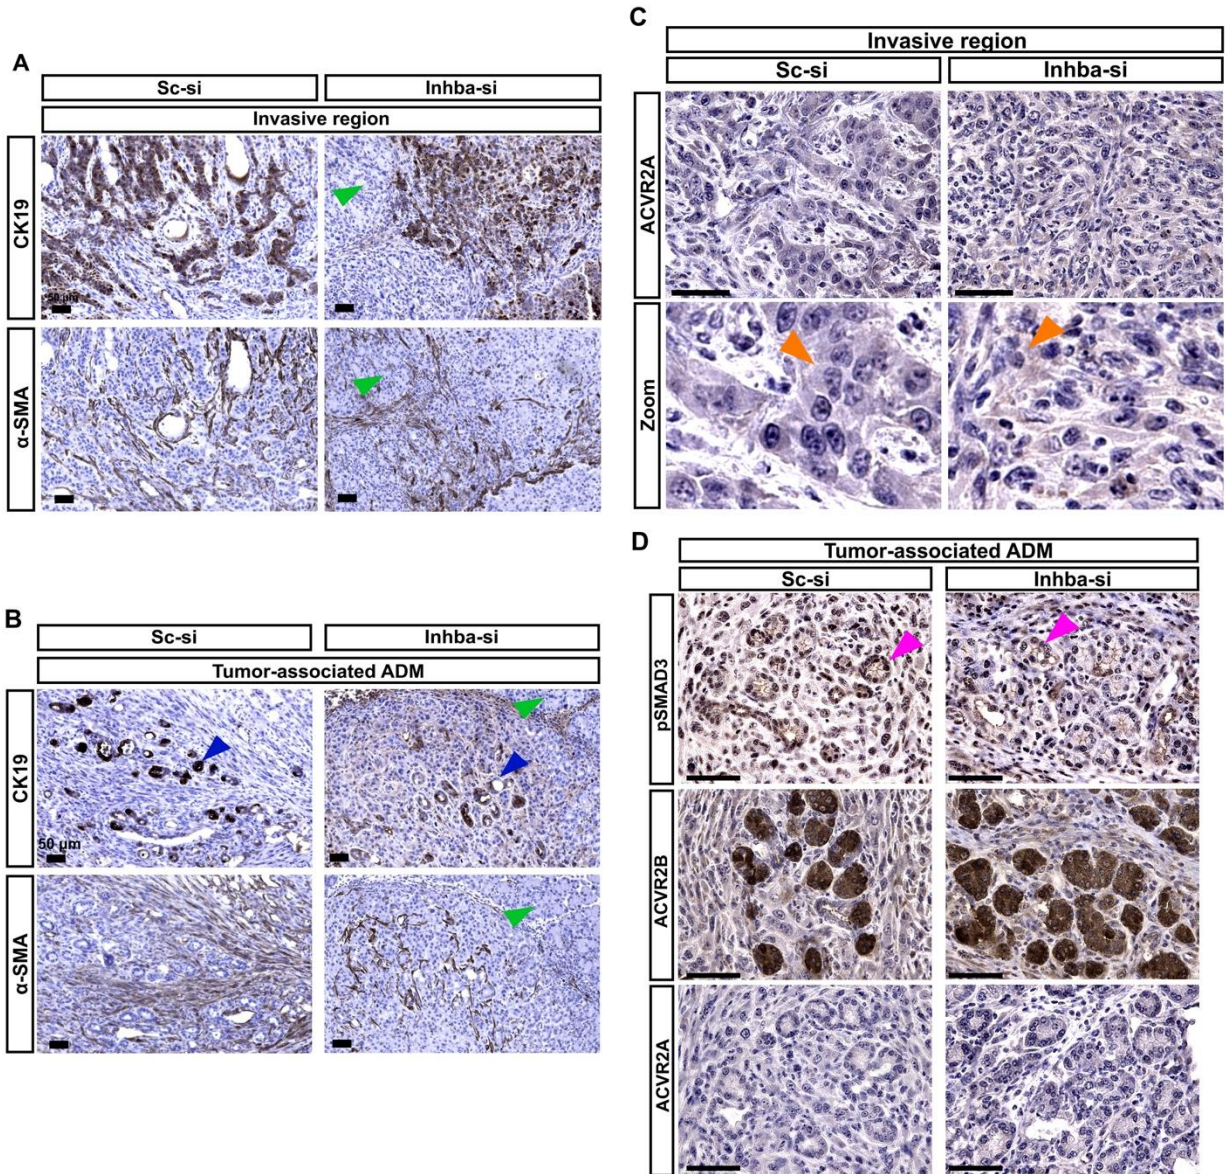

**Figure S7. IHC of tumor CK19,  $\alpha$ -SMA, ACVR2A, ACVR2B and pSMAD3 (Ser423/425). A and B.** CK19 and  $\alpha$ -SMA staining of invasive region and acinar-to-ductal transforming region of tumors. Green arrow indicates acinar cells. Blue arrow indicates duct-like cells. **C.** ACVR2A expression of invasive region of tumors by IHC. Orange arrow indicates invasive cancer cells. **D.** pSMAD3, ACVR2B and 2A staining of acinar-to-ductal transforming (pink arrow) region of tumors. Scale bar 50  $\mu$ m.



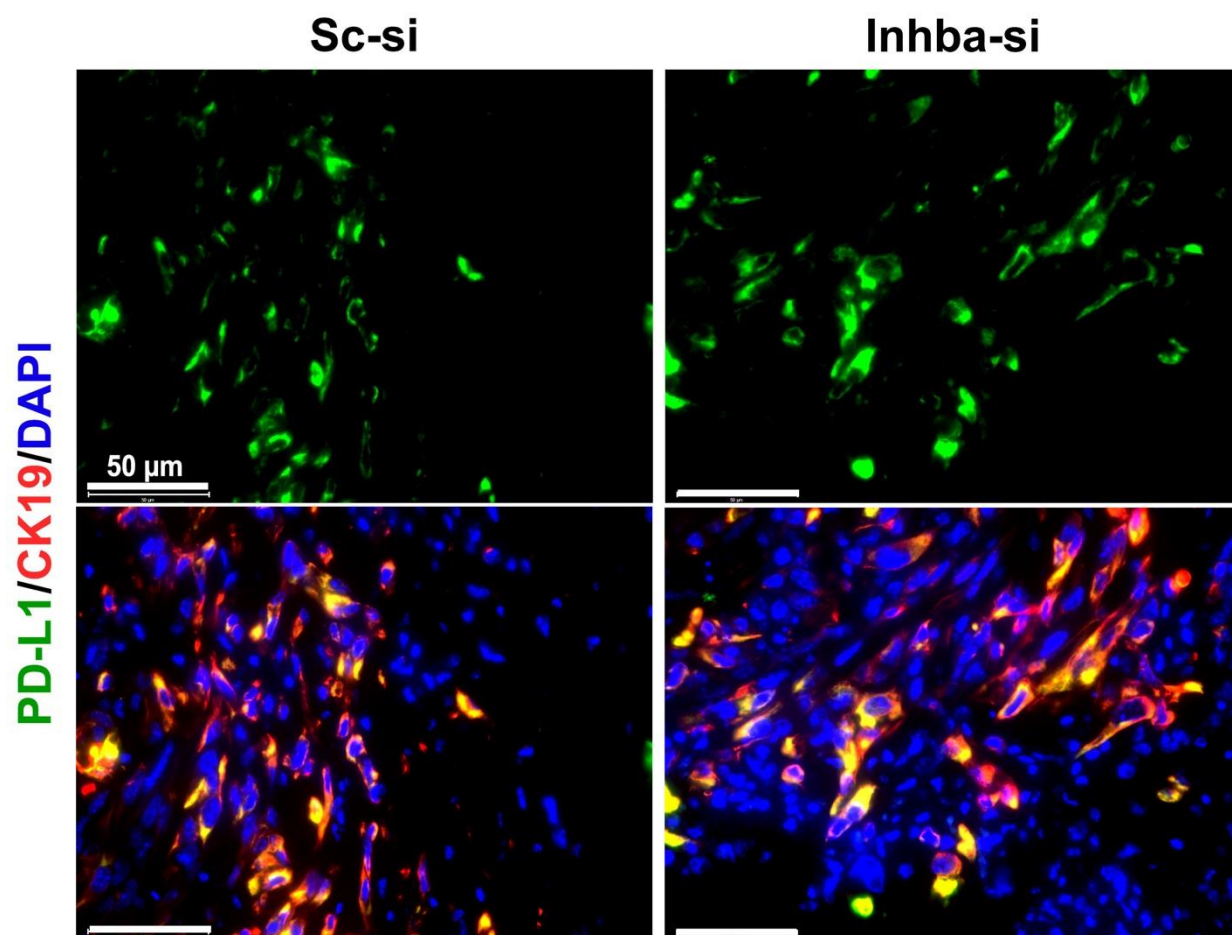

**Figure S8. PD-L1 expression remained unchanged in CK19-positive cells in tumors by Inhba-si.** Representative image of tumor immunofluorescence staining for PD-L1 and CK19 from mice treated with either Sc-si or Inhba-si. Scale bar = 50  $\mu\text{m}$ .

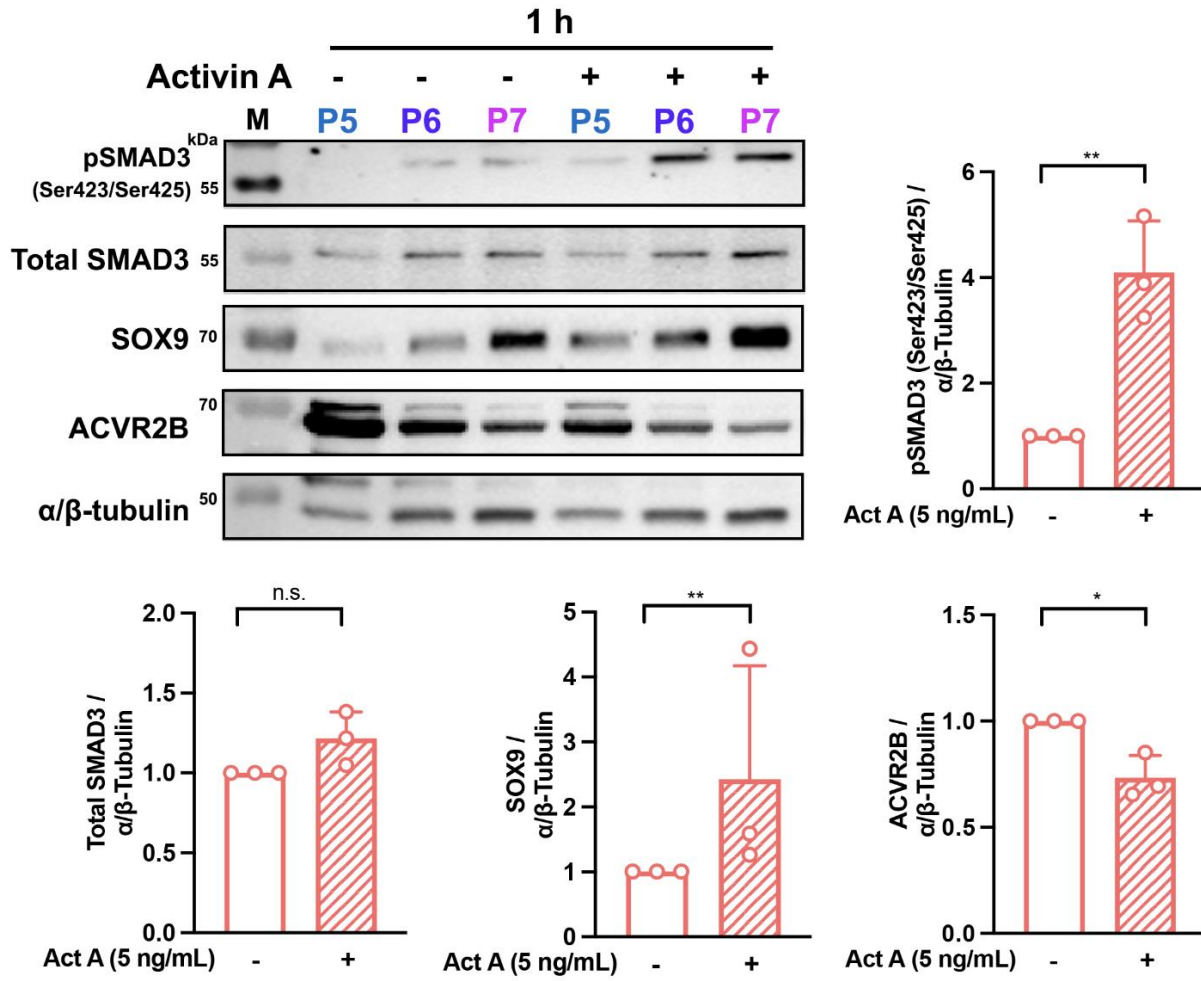

**Figure S9. Activin A upregulates SOX9 and decreases ACVR2B in 266-6 acinar cells.** Western blot analysis of pSMAD3, SMAD3, SOX9 and ACVR2B in 266-6 acinar cells treated with Activin A (5 ng/mL) for 1 hour (three independent experiments, n=3). \*  $P < 0.05$

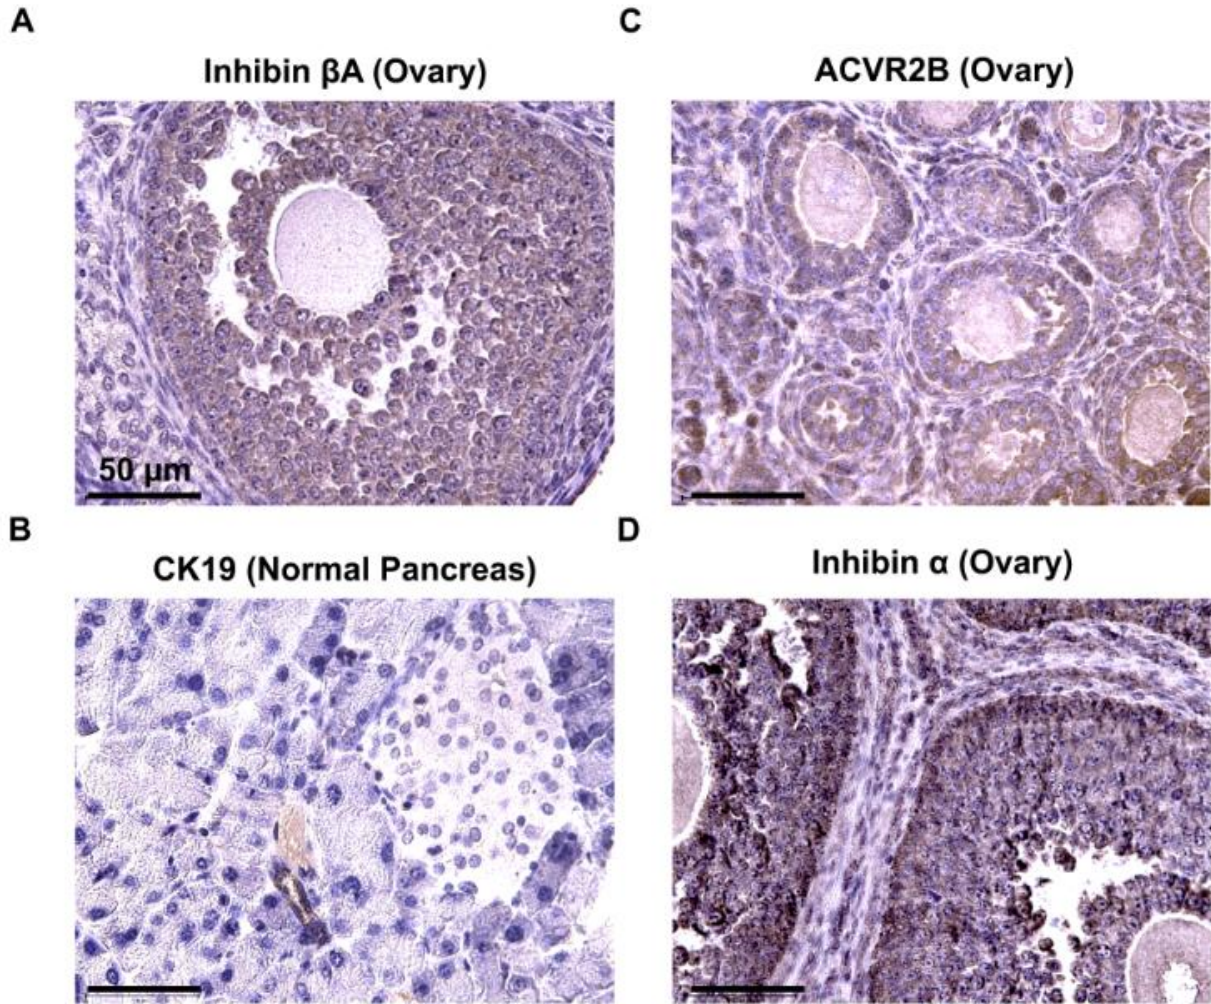

**Figure S10. IHC assays of antibodies with positive control tissues.** **A.** Intense staining of Inhibin  $\beta$ A on granulosa cells in antral follicles of mouse ovary. **B.** Duct-specific CK19 staining on the mouse pancreas. **C and D.** Intense staining of ACVR2B and Inhibin  $\alpha$  on granulosa cells in growing and antral follicles of mouse ovary. Scale bar = 50  $\mu$ m.

## Legends for Supplementary Tables

**Table S1. Chi-square test for tissue metastasis**

| Group    | Metastasis (nodules) |    | <i>p-value</i> |
|----------|----------------------|----|----------------|
|          | Yes                  | No |                |
| TO       | 8                    | 8  | <i>ns</i>      |
| Sc-si    | 13                   | 7  |                |
| TO       | 8                    | 8  | $<0.05$        |
| Inhba-si | 2                    | 18 |                |
| Sc-si    | 13                   | 7  | $<0.001$       |
| Inhba-si | 2                    | 18 |                |

Table S4. Chi-square test for tissue metastasis

**Table S2. Tissues with nodules and H&E-confirmed invasive metastasis**

|           | <b>Sham<br/>(n=4)</b>       | <b>Tumor<br/>(n=4)</b> | <b>Sc-si<br/>(n=5)</b> | <b>Inhba-si<br/>(n=5)</b> | <b>Sham<br/>(n=4)</b>                          | <b>Tumor<br/>(n=4)</b> | <b>Sc-si<br/>(n=5)</b> | <b>Inhba-si<br/>(n=5)</b> |
|-----------|-----------------------------|------------------------|------------------------|---------------------------|------------------------------------------------|------------------------|------------------------|---------------------------|
|           | <b>Tissues with nodules</b> |                        |                        |                           | <b>Invasive metastasis (H&amp;E confirmed)</b> |                        |                        |                           |
| Liver     | 0                           | 3 (75%)                | 5 (100%)               | 2 (40%)                   | 0                                              | 3 (100%)               | 5 (100%)               | 1 (50%)                   |
| Spleen    | 0                           | 2 (50%)                | 4 (80%)                | 0                         | 0                                              | 0                      | 0                      | 0                         |
| Kidney    | 0                           | 2 (50%)                | 3 (60%)                | 0                         | 0                                              | 0                      | 1 (33%)                | 0                         |
| Intestine | 0                           | 1 (25%)                | 1 (20%)                | 0                         | 0                                              | 0                      | 1 (100%)               | 0                         |

### Table S3. List of sequences for primers and siRNAs

Table S3. List of sequences for primers and siRNAs

| Gene                              | Primer sequence                                                       | Species           |
|-----------------------------------|-----------------------------------------------------------------------|-------------------|
| <i>Inhba</i>                      | Mm00434339_m1                                                         | Mouse             |
| <i>Muc5b</i>                      | s: 5'-GCATCATCAACAGTGCAACG-3'<br>as: 5'-GCAGAAACACTCGCAGTCA-3'        | Mouse             |
| <i>Muc1</i>                       | s: 5'-CCTACCATCCTATGAGTGAATACC-3'<br>as: 5'-GACTGCTACTGCCATTACCTG-3'  | Mouse             |
| <i>Muc4</i>                       | s: 5'-CAGCCTCTCCAAGAAATGTAGT-3'<br>as: 5'-GACAAGTTAGTCCTGACATCCC-3'   | Mouse             |
| <i>Muc5ac</i>                     | s: 5'-CCACTTTCTCCTTCTCCACACC-3'<br>as: 5'-GGTTGTCG9ATGCAGCCTTGCTT-3'  | Mouse             |
| <i>Acvr1a</i>                     | s: 5'-CCATTGAAGGGCTCATCACCAC-3'<br>as: 5'-CCGTTCTGTACCAGGAAAGG-3'     | Mouse             |
| <i>Acvr1b</i>                     | s: 5'-TTCTTCCCCTTGTGTCTC-3'<br>as: 5'-ACAGGTGTAGTTGGTCTGTAGG-3'       | Mouse             |
| <i>Acvr1c</i>                     | s: 5'-AGACGGTGATGCTGAGACACGA-3'<br>as: 5'-GACCATTCCAGCCACAGTCACT-3'   | Mouse             |
| <i>Acvr2a</i>                     | s: 5'-TCATACCTGCATGAGGATGTG-3'<br>as: 5'-CCAAGCCAAAGTCAGCCA-3'        | Mouse             |
| <i>Acvr2b</i>                     | s: 5'-CCTGGCTGTTTCGGTTTGAG-3'<br>as: 5'-GCGTCTCTTGGAAGTTGATG-3'       | Mouse             |
| <i>Rn18S</i>                      | Mm03928990_g1                                                         | Mouse             |
| #1 <i>Inhba</i> DsiRNA            | 5'-AACGCGAUCAGAAAGCUUCAUGUGG-3'<br>3'-AGUUGCGCUAGUCUUUCGAAGUACACC-5'  | Mouse             |
| #2 <i>Inhba</i> DsiRNA            | 5'-CUGAAAGUCCCCAAGGCUAACAGAA-3'<br>3'-AGGACUUUCAGGGGUUCCGAUUGUCUU-5'  | Mouse             |
| #3 <i>Inhba</i> DsiRNA            | 5'-ACGAUGAUGGUCAAAACAUCAUCA-3'<br>3'-AAUGCUACUACCAGUUUUGUAGUAGUU-5'   | Mouse             |
| #4 <i>Inhba</i> DsiRNA            | 5'-GUCAAGAAGCACAUUCUAAAACAUGC-3'<br>3'-GACAGUUCUUCGUGUAGAAUUUGUACG-5' | Mouse             |
| Scrambled negative control DsiRNA | Cat. # 51-01-19-09, Integrated DNA Technologies                       | Human, Mouse, Rat |

## Table S4. List of primary and secondary antibodies

Table S4. List of primary antibodies

| Antibody                | Host   | Dilution       | Company                            | Catalog no. |
|-------------------------|--------|----------------|------------------------------------|-------------|
| Inhibin $\beta$ A       | Rabbit | 1:50           | Gifted by Dr. Wylie Vale           |             |
| SOX9                    | Rabbit | 1:1000         | Cell Signaling Technology          | 82630S      |
| Cytokeratin 19          | Rat    | 1:100          | Development Studies Hydridoma Bank | TROMA-III-c |
| Smad3                   | Rabbit | 1:1000 or 1:50 | Cell Signaling Technology          | 9523S       |
| $\alpha$ -SMA           | Rabbit | 1:50           | Cell Signaling Technology          | 19245T      |
| Acvr2A                  | Rabbit | 1:50           | Millipore Sigma                    | HPA046997   |
| Acvr2B                  | Rabbit | 1:50           | Invitrogen                         | PA5-111122  |
| Inhibin $\alpha$        | Rabbit | 1:50           | Gifted by Dr. Wylie Vale           |             |
| Bax                     | Rabbit | 1:50           | Cell Signaling Technology          | #2772       |
| PD-L1                   | Rabbit | 1:50           | R&D Systems                        | AF1019      |
| Prrx1                   | Rabbit | 1:100          | Thermo Fisher                      | PA5-106700  |
| CD3                     | Rabbit | 1:50           | Cell Signaling Technology          | 78588T      |
| CD8                     | Rabbit | 1:50           | Cell Signaling Technology          | 98941T      |
| Amylase                 | Rabbit | 1:50           | Cell Signaling Technology          | 3796S       |
| p-p38                   | Rabbit | 1:1000         | Cell Signaling Technology          | 9211S       |
| p38                     | Rabbit | 1:1000         | Cell Signaling Technology          | 9212S       |
| p-Smad3                 | Rabbit | 1:1000         | Rockland                           | 600-401-919 |
| E-Cadherin              | Rabbit | 1:50           | Cell Signaling Technology          | 14472S      |
| N-Cadherin              | Rabbit | 1:50           | Cell Signaling Technology          | 13116S      |
| CFTR                    | Rabbit | 1:50           | Novus Biologicals                  | NB300-511   |
| $\alpha/\beta$ -Tubulin | Rabbit | 1:1000         | Cell Signaling Technology          | 2148S       |

List of secondary antibodies

| Antibody        | Conjugation     | Dilution       | Company                   | Catalog no. |
|-----------------|-----------------|----------------|---------------------------|-------------|
| Anti-rabbit IgG | HRP             | 1:2000         | Cell Signaling Technology | 7074        |
| Anti-mouse IgG  | HRP             | 1:2000         | Cell Signaling Technology | 7076        |
| Anti-rabbit IgG | Biotinylated    | 1:200 or 1:400 | Vector Laboratories       | BA-1000-1.5 |
| Anti-rat IgG    | Biotinylated    | 1:200 or 1:400 | Vector Laboratories       | BA-9400-1.5 |
| Anti-mouse IgG  | Alexa Fluor 488 | 1:100-200      | Invitrogen                | A-11001     |
| Anti-rabbit IgG | Alexa Fluor 488 | 1:100-200      | Invitrogen                | A-11008     |
| Anti-rat IgG    | Alexa Fluor 568 | 1:100-200      | Invitrogen                | A-11077     |
| Anti-Goat IgG   | Alexa Fluor 488 | 1:100          | Invitrogen                | A-11055     |
